# Supplementary material for: Synergetic Action of Domain II and IV Underlies Persistent Current Generation in Nav1.3 as revealed by a tarantula toxin
Source: PubMed Central journal article supplement (PMC4363837; doi:10.1038/srep09241), 2015-03-18
Supplement: srep09241-s1.pdf [file srep09241-s1.pdf]

**Synergetic Action of Domain II and IV Underlies Persistent Current Generation in Na<sub>v</sub>1.3 as revealed by a tarantula toxin**

Cheng Tang<sup>1,#</sup>, Xi Zhou<sup>1,#</sup>, Yunxiao Zhang<sup>1</sup>, Zhaohua xiao<sup>2</sup>, Zhaotun Hu<sup>1</sup>, Changxin Zhang<sup>1</sup>, Ying Huang<sup>1</sup>, Bo Chen<sup>1</sup>, Zhonghua Liu<sup>1,\*</sup>, Songping Liang<sup>1,\*</sup>

<sup>1</sup>College of Life Science, Hunan Normal University, Changsha, Hunan, 410081, China

<sup>2</sup>Department of Pediatrics, Xiangya Hospital of Central South University, Changsha, Hunan, 410008, China

\*Corresponding author: Zhonghua Liu, [liuzh@hunnu.edu.cn](mailto:liuzh@hunnu.edu.cn); Songping Liang, [liangsp@hunnu.edu.cn](mailto:liangsp@hunnu.edu.cn)

#Contribute equally to this study

## Supplementary results:

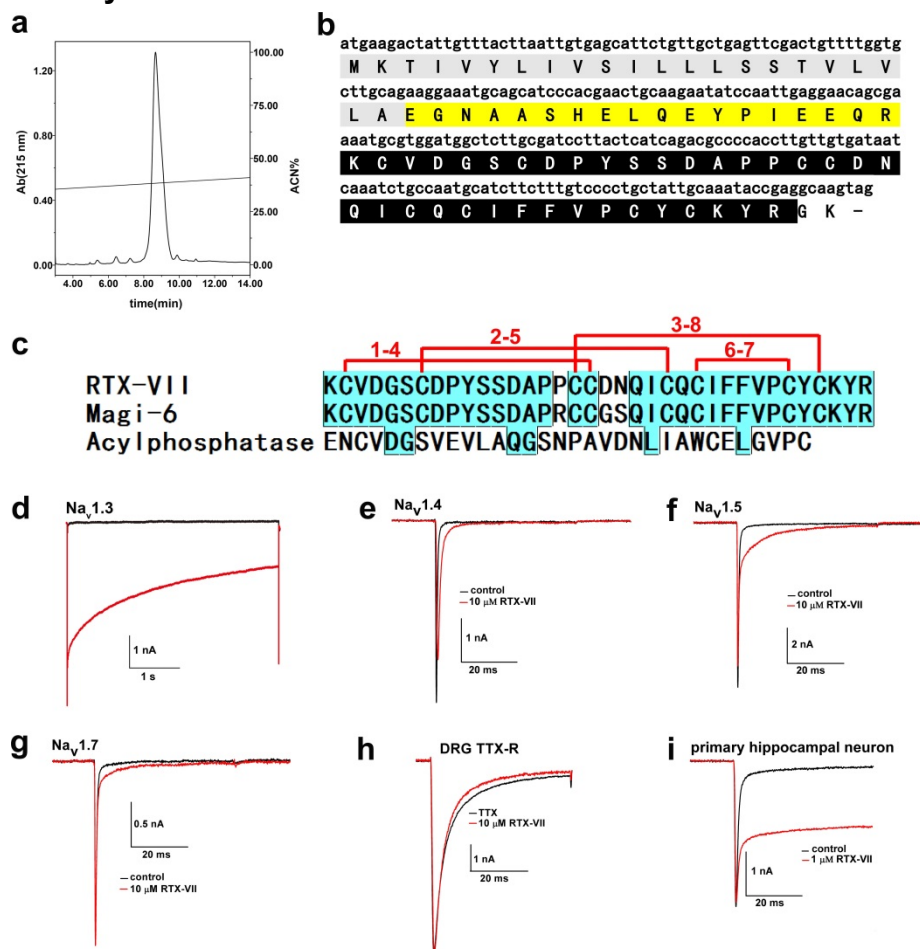

Supplementary Fig S1: (a) RTX-VII was further purified by analytical  $C_{18}$  RP-HPLC using a narrower acetonitrile gradient. (b) The cDNA sequence of RTX-VII. The signal peptide is shown in gray, the pro-peptide is shown in yellow and the mature peptide is shown with white text on a black ground. Note partial sequence of the mature peptide was also determined by Edman degradation as shown in supplementary Fig S1j. (c) RTX-VII shows high sequence similarity to the known toxin Magi-6; the possible disulfide mode was also shown. (d) RTX-VII induced large  $I_{NaP}$  in  $Na_v1.3$  even lasting for several seconds ( $n = 4$ ). (e, f, g, h) Representative traces showing that  $Na_v1.4$ ,  $Na_v1.5$ ,  $Na_v1.7$  as well as DRG TTX-R  $Na_v$ s ( $Na_v1.8$  and  $Na_v1.9$ ) were resistant to RTX-VII even at the toxin concentration of  $10 \mu M$  ( $n = 4 - 6$ ). (i) Representative trace showing  $Na_v$ s in neonatal rat hippocampal neurons were highly sensitive to RTX-VII, with  $1 \mu M$  toxin dramatically inhibiting the inactivation and inducing a large  $I_{NaP}$  ( $n = 6$ ).

### Supplementary Fig S1j:

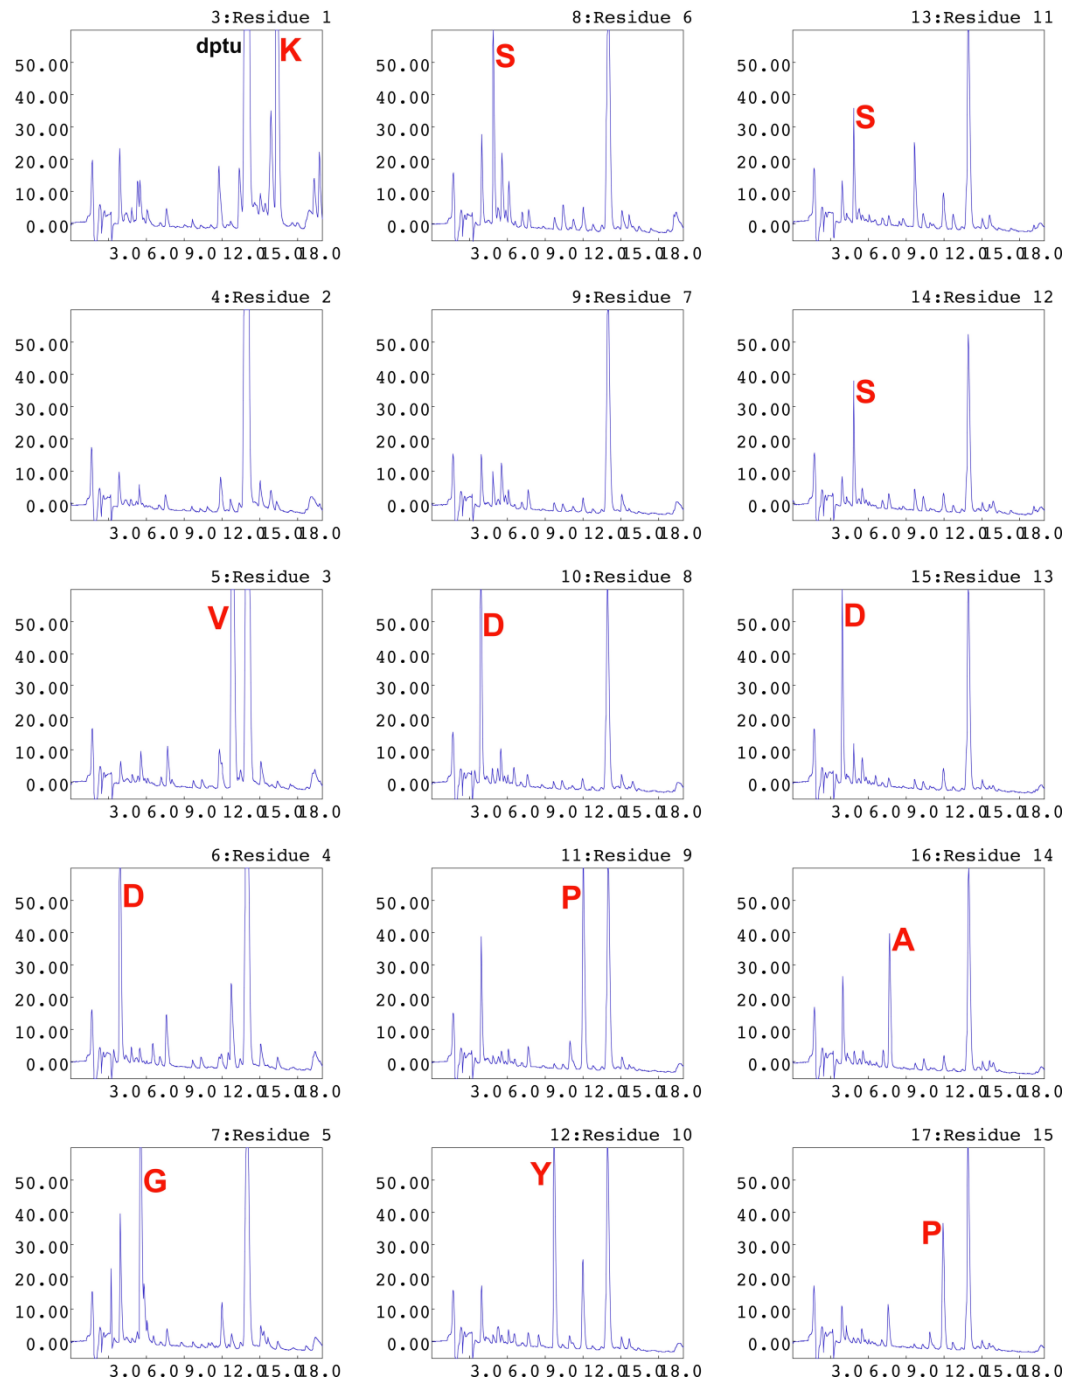

**Supplementary Fig S1j(continued):**

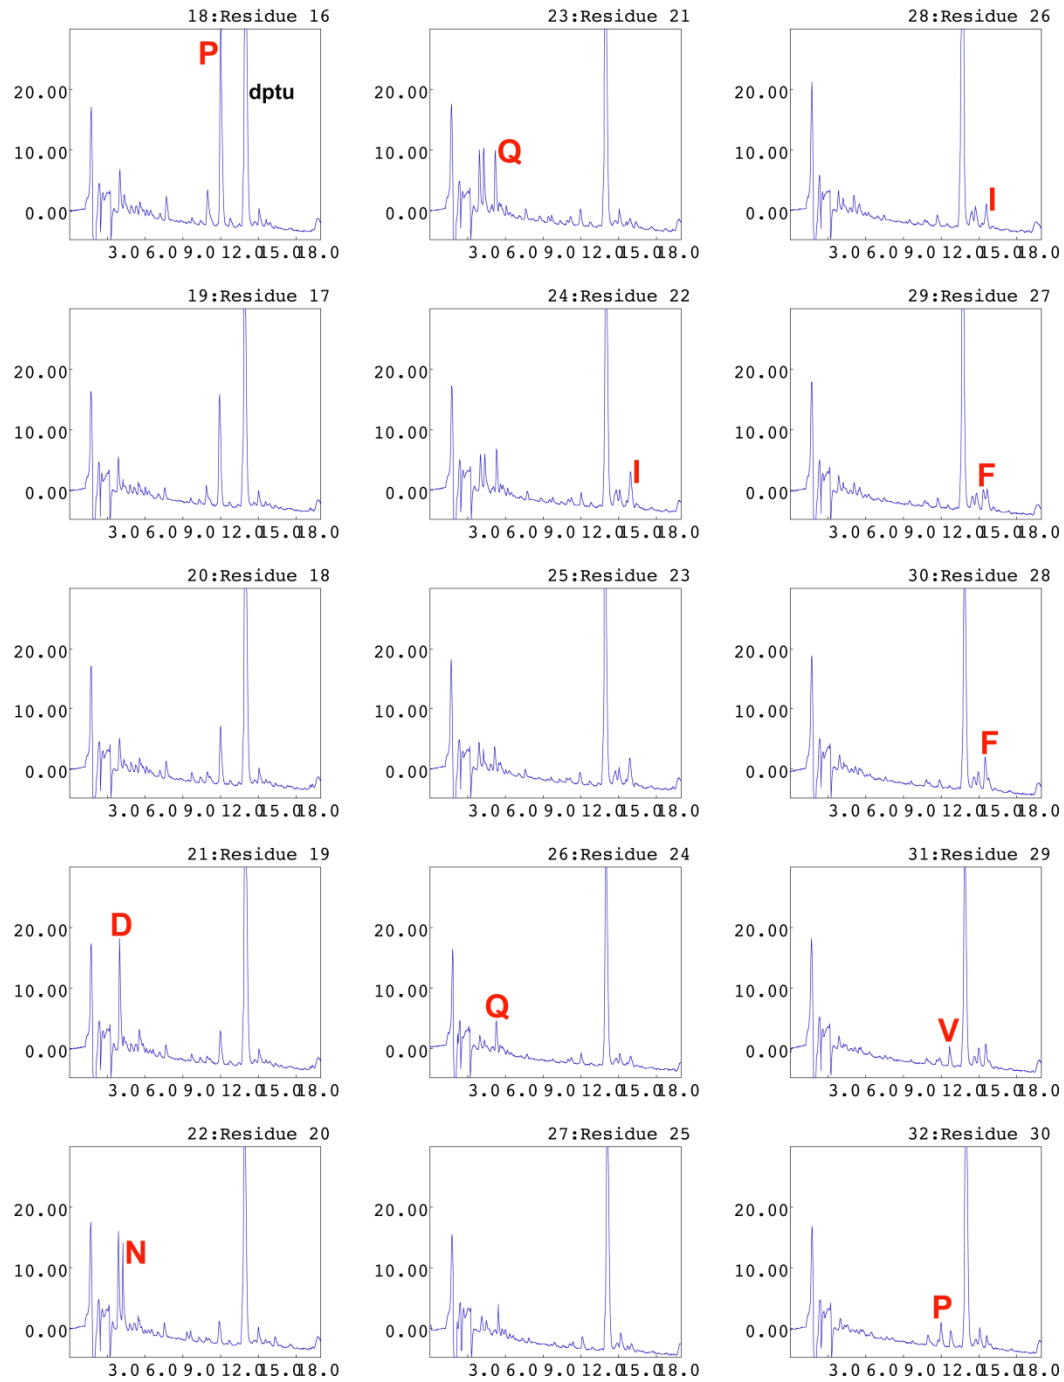

Supplementary Fig S1j: Edman degradation of RTX-VII. Peaks representing the first 30 N-terminal residues could be recognized in the RP-HPLC chromatograms, while the first 22 residues were well characterized. In each cycle, the peak representing the corresponding residue was labeled, and the unlabeled cycle indicated a cysteine residue.

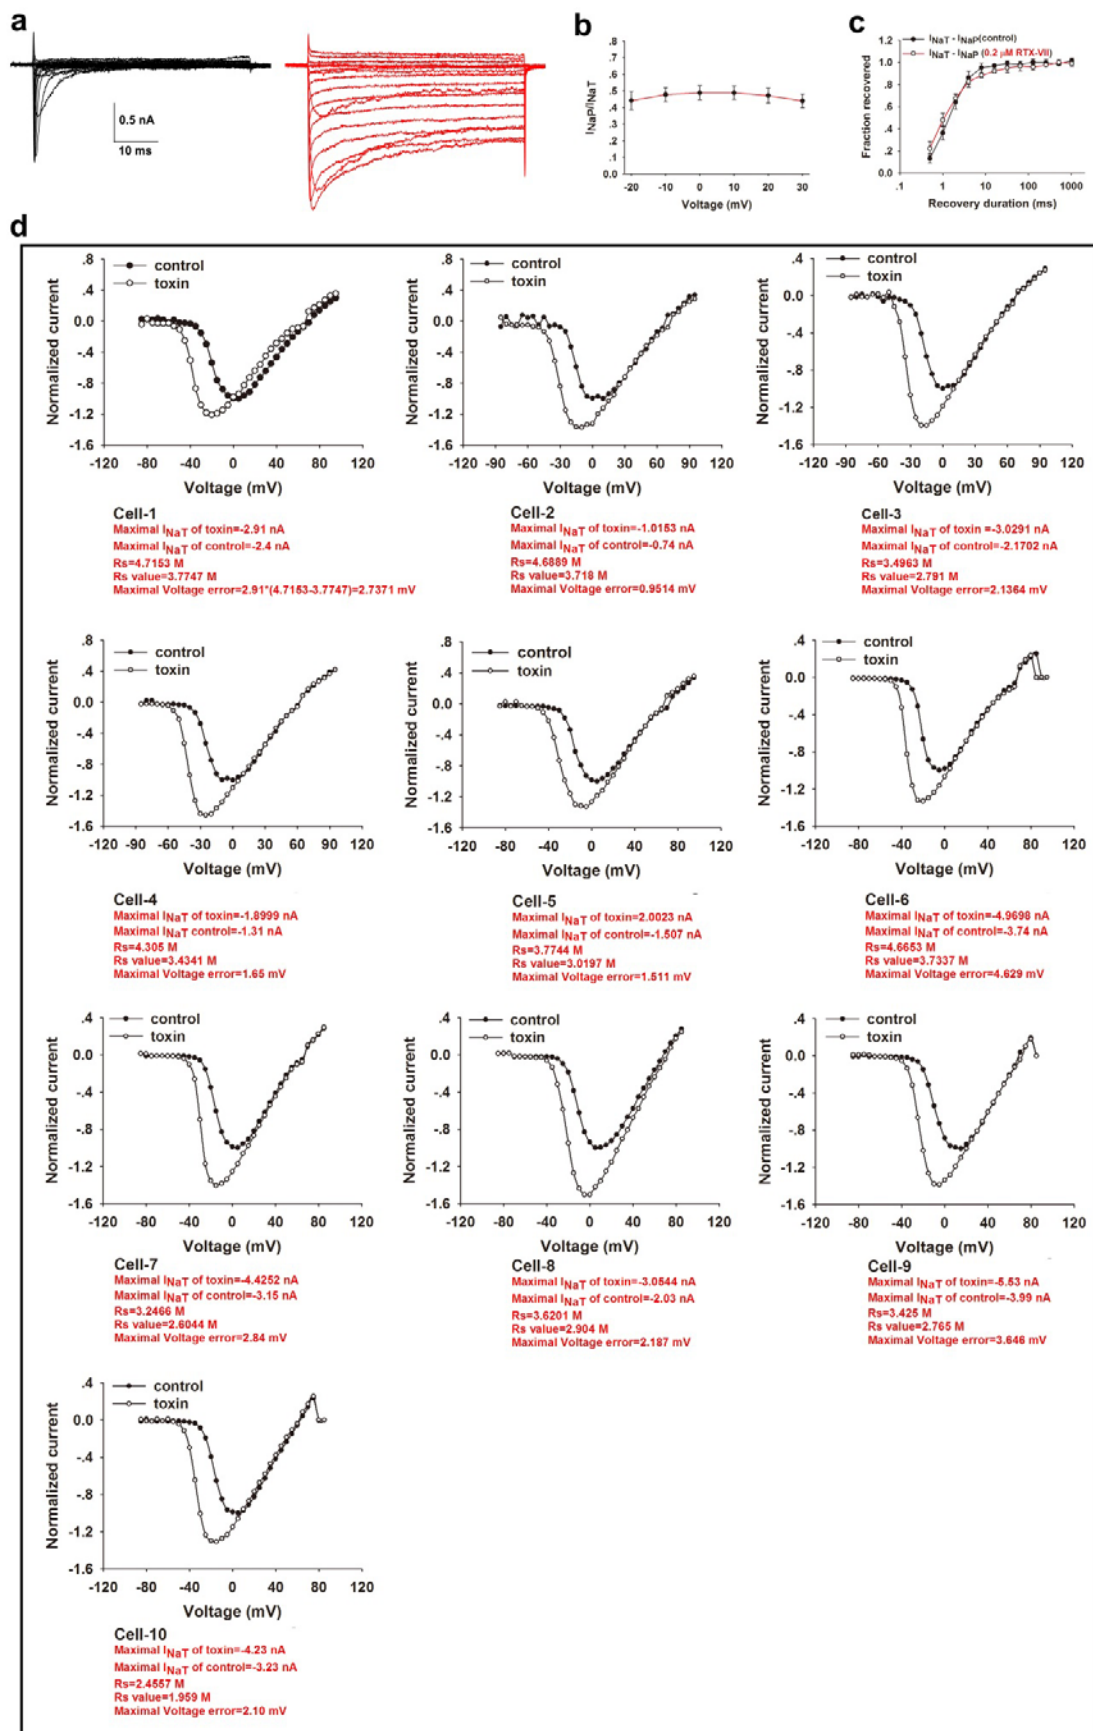

Supplementary Fig S2: (a) A cluster of current traces of  $Na_v1.3$  elicited by an I-V protocol

shows 0.2  $\mu\text{M}$  RTX-VII enhanced the inward  $I_{\text{NaT}}$  but not the outward  $I_{\text{NaT}}$  and induced large  $I_{\text{NaP}}$  (*right, red traces*) compared to control (*left, black traces*) ( $n = 11$ ). (b) 0.2  $\mu\text{M}$  RTX-VII enhanced the  $I_{\text{NaP}}$  of  $\text{Na}_v1.3$  in a voltage-independent manner at depolarizing voltages ranging from -20 mV to 30 mV ( $n = 6$ ). (c) If  $I_{\text{NaP}}$  was subtracted from  $I_{\text{NaT}}$  in both control and toxin-treated  $\text{Na}_v1.3$ , the residual transient-inward currents in both groups shared rather similar repriming kinetics ( $n = 5$ ). (d) Representative I-V traces of ten separate cells expressing  $\text{Na}_v1.3$  before and after the application of RTX-VII, the current amplitude, the amplitude of uncompensated series resistance, and the maximum uncompensated  $R_s$  caused voltage error of each cell were shown.

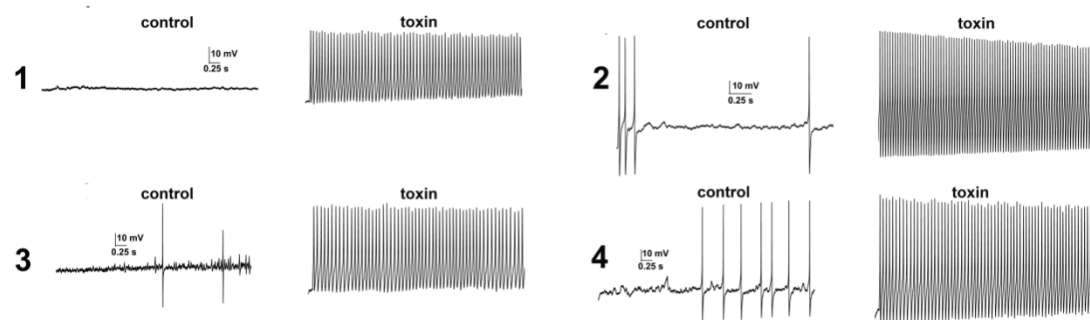

Supplementary Fig S3: Representative traces show RTX-VII triggering spontaneous high frequency AP firing in neonatal rat hippocampal neurons. The data of four cells were shown.

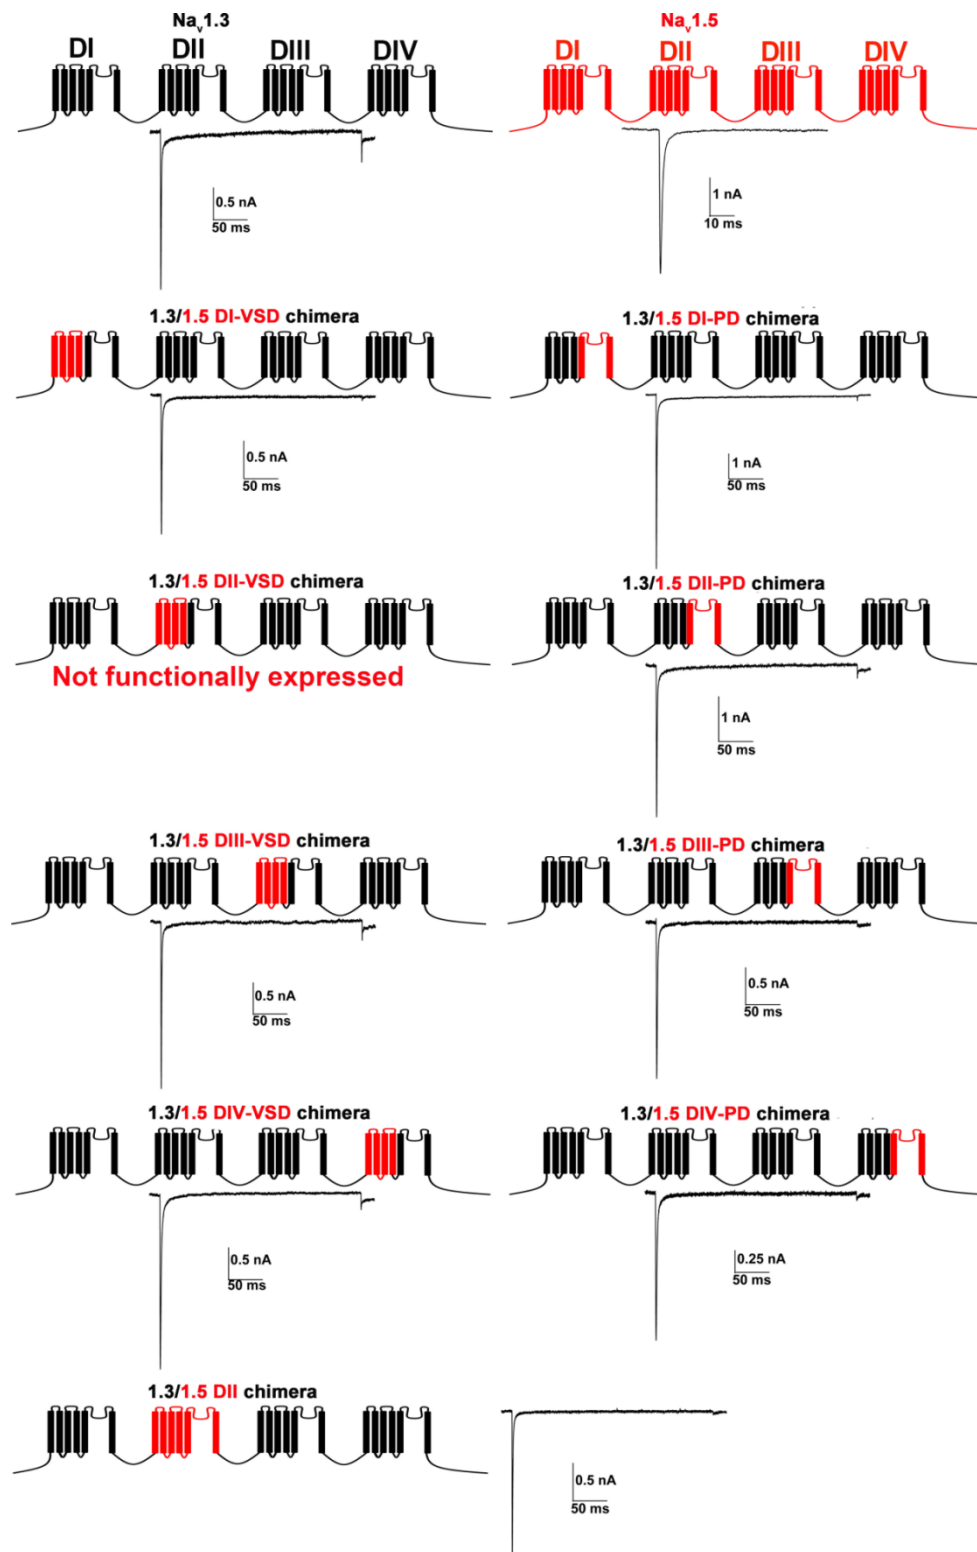

Supplementary Fig S4: Diagrams show the strategy for the construction of Na<sub>v</sub>1.3 derived chimeric channels. Na<sub>v</sub>1.3 and Na<sub>v</sub>1.5 are shown in black and red, respectively. The specific VSD (S1-S4) or PD (S5-S6) in Na<sub>v</sub>1.3 was substituted with the corresponding one of Na<sub>v</sub>1.5. Except Na<sub>v</sub>1.3/1.5 DII-VSD chimera, all the other hybrid channels expressed in HEK293T cells produce large currents in response to a 10 mV depolarization from the holding potential of -100 mV (n = 7-11).

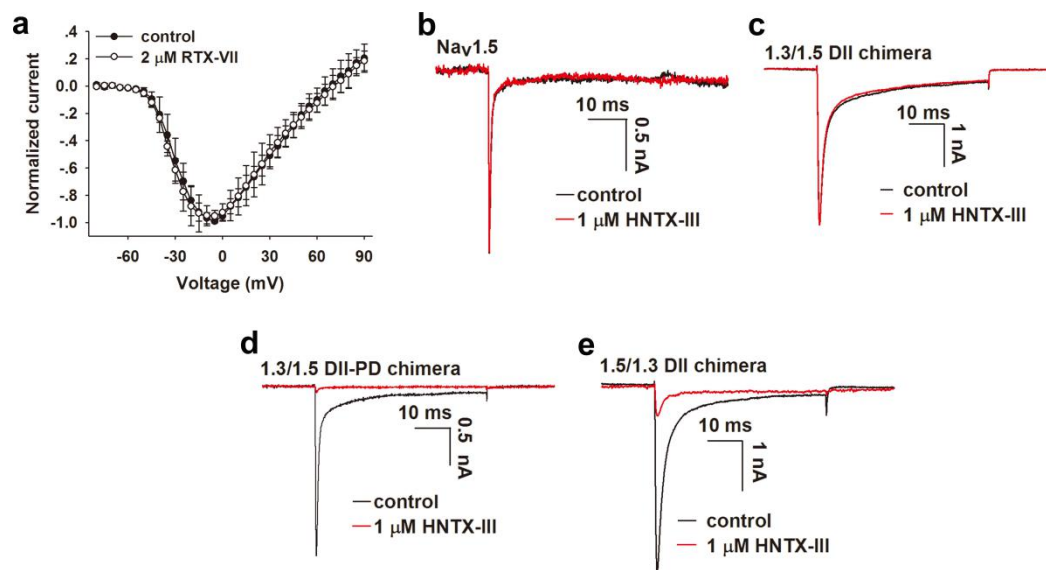

Supplementary Fig S5: (a) RTX-VII did not alter the I-V relationship of  $\text{Na}_v1.5$ . (b, c, d)  $\text{Na}_v1.5$  and 1.3/1.5 DII chimera were resistant to HNTX-III, but the substitution of DII-PD with that of  $\text{Na}_v1.5$  (1.3/1.5 DII-PD chimera) did not affect the inhibitory effect of HNTX-III on  $\text{Nav}1.3$ . (e) The reconstruction of the DII of  $\text{Na}_v1.3$  to  $\text{Na}_v1.5$  restored the inhibitory activity of HNTX-III.



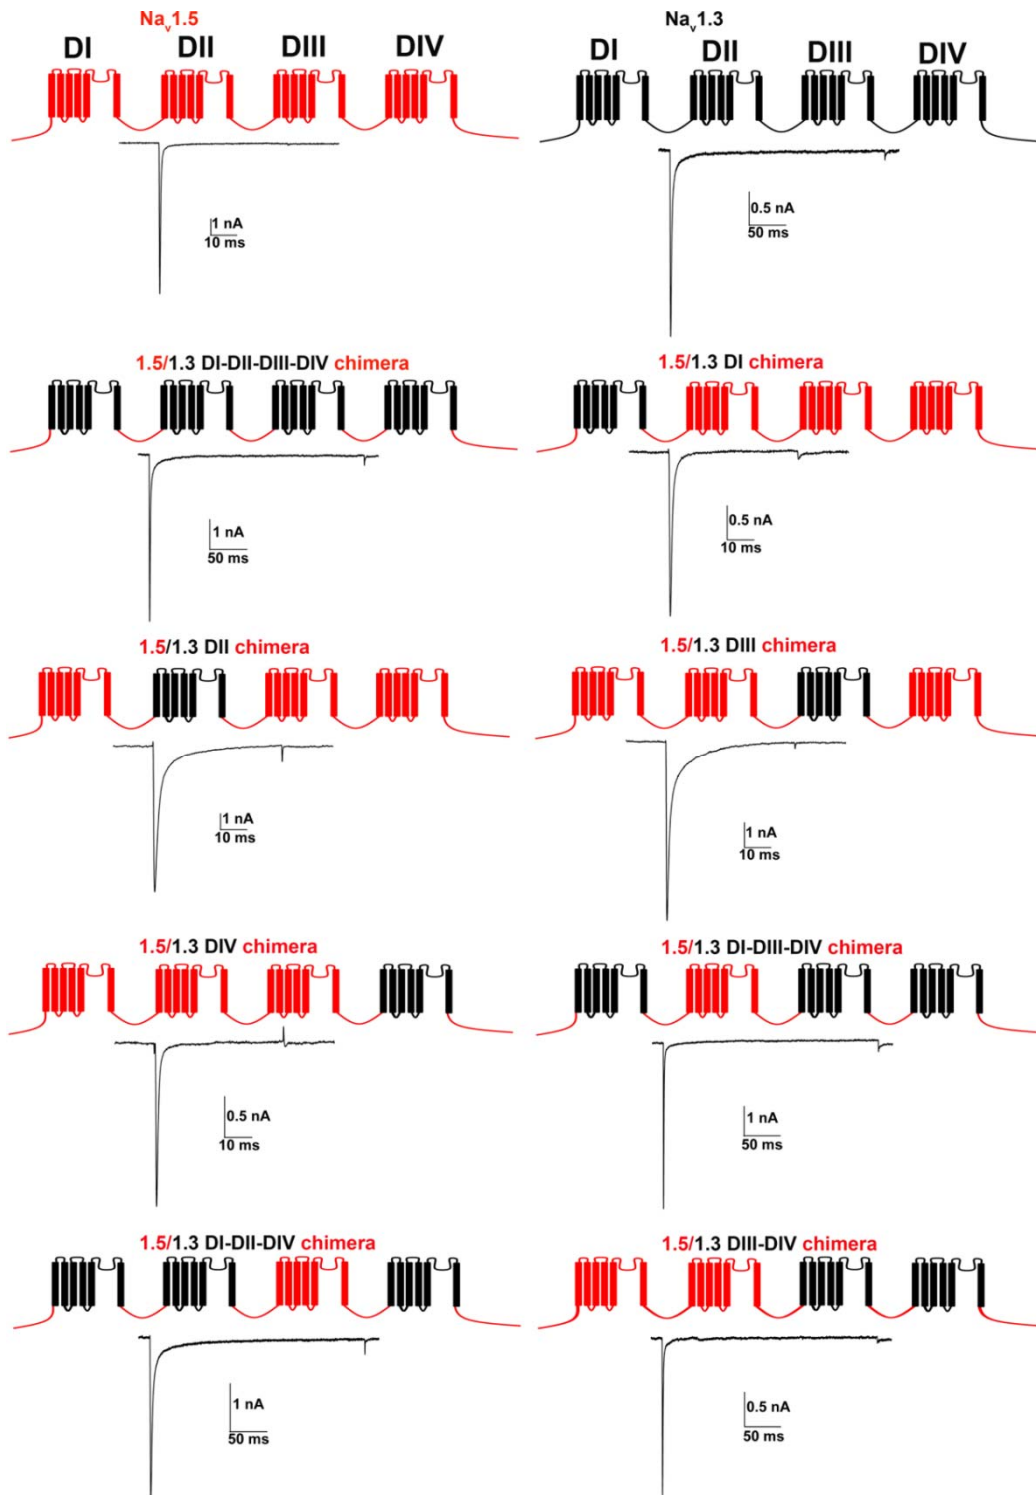

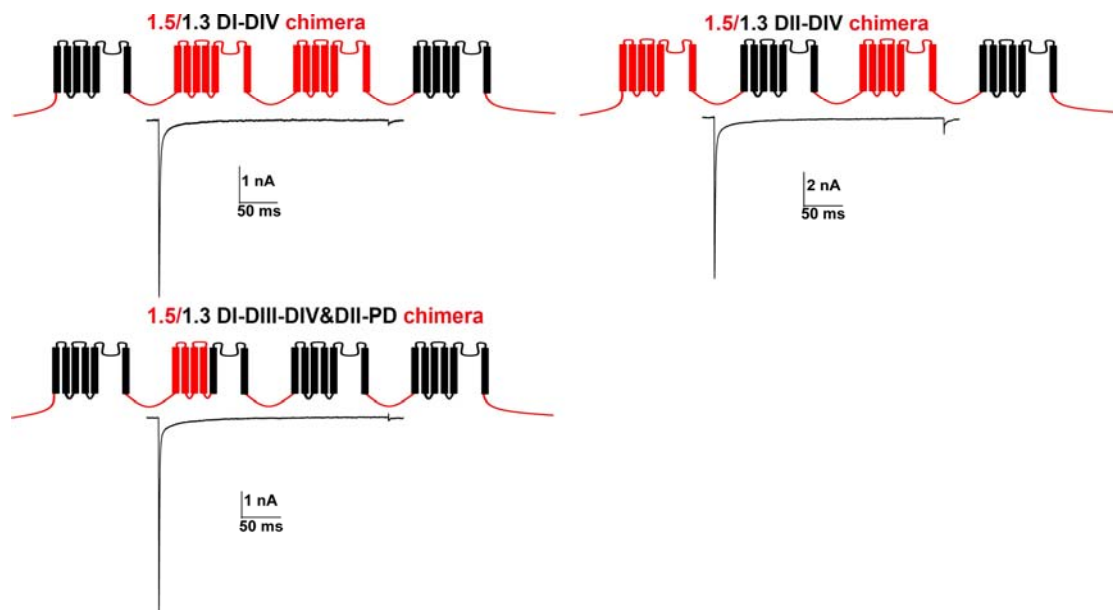

Supplementary Fig S6: Diagrams show the strategy for the construction of  $\text{Na}_v1.5$  derived chimeric channels.  $\text{Na}_v1.3$  and  $\text{Na}_v1.5$  are shown in black and red, respectively. One or several domains of  $\text{Na}_v1.5$  were substituted with the corresponding ones of  $\text{Na}_v1.3$ . All the  $\text{Na}_v1.5$  derived hybrid channels expressed in HEK293T cells produce large currents in response to a 10 mV depolarization from the holding potential of -100 mV ( $n = 6 - 9$ ).

Supplementary Table S1: Site mutations in Nav1.3 differently affect channel's steady-state activation and inactivation

|           | Steady state Activation |                        | Steady state inactivation |            |
|-----------|-------------------------|------------------------|---------------------------|------------|
|           | Va(mV)                  | Ka(mV)                 | Vh(mV)                    | Kh(mV)     |
| WT Nav1.3 | -12.71±4.92             | 6.84±0.98              | -44.58±2.73               | -6.98±1.44 |
| K1503P    | -12.04±3.88             | 7.62±1.63              | -40.38±8.76               | -6.51±1.36 |
| Y1504E    | -12.43±1.51             | 7.21±0.79              | -43.19±1.09               | -6.69±1.50 |
| M1505K    | -15.02±3.21             | 4.66±1.35 <sup>c</sup> | -37.36±7.77 <sup>a</sup>  | -6.01±0.88 |
| T1506I    | -10.96±3.45             | 6.22±0.47              | -42.38±7.11               | -5.47±0.48 |
| L1507N    | -5.30±3.65 <sup>b</sup> | 6.02±0.80              | -37.21±3.93 <sup>b</sup>  | -5.62±0.43 |
| E1562R    | -11.38±0.56             | 7.85±1.22              | -53.31±2.39 <sup>b</sup>  | -7.36±1.05 |
| E1562Q    | -3.36±1.60 <sup>c</sup> | 7.67±0.88              | -45.84±2.93               | -6.21±0.92 |

a, p<0.05

b, p<0.01

c, p<0.001

Supplementary Table S2: Primers used to construct the Na<sub>v</sub>1.3 derived chimeric channels in supplementary Fig S4.

| Primer ID               | Sequence 5'-3'                              |
|-------------------------|---------------------------------------------|
| 1.3/1.5DI-VSD VL-for    | CTTAATGGCAATTTTCCTAACAGGGT                  |
| 1.3/1.5DI-VSD VL-rev    | AAGACCATCGTGGGGGCCCTGATCC                   |
| 1.5DI-VSD S-for         | AAAATTGCCATTAAGATTCTGGTTCACTCGCTCTTCAACAT   |
| 1.5DI-VSD S-rev         | CCCCACGATGGTCTTCAGCCCTGAAATGACTGATATAGTT    |
| 1.3/1.5 DI-PD VL-rev    | GTCGGACAGCTTCTTCACGGACTGG                   |
| 1.3/1.5 DI-PD VL-for    | TATGAGGAGCAGAACCAGGCCACAC                   |
| 1.5 DI-PD S-for         | AAGAAGCTGTCCGACGTGATGGTCCTCACAGTCTTCTGCC    |
| 1.5 DI-PD S-rev         | GTTCTGCTCCTCATAGGCCATTGCGACCACGGCCAGGATC    |
| 1.3/1.5 DII-VSD VL-rev  | ATTCACAAGATGCTTCACTTTTAACCA                 |
| 1.3/1.5 DII-VSD VL-for  | ATGCTCATTAAAGATCATCGGCAACTCG                |
| 1.5 DII-VSD S-for       | AAGCATCTTGTGAATTTGGTGGTCATGGACCCGTTTACTG    |
| 1.5 DII-VSD S-rev       | GATCTTAATGAGCATCAGGGTGGGCCATGATTTGGCCAG     |
| 1.3/1.5 DII-PD VL-rev   | GTTGCCAGTGCGCCACCGAGT                       |
| 1.3/1.5 DII-PD VL-for   | AGTTCCTTTAGTTCAGATAACCTTGC                  |
| 1.5 DII-PD S-for        | GGCGCACTGGGCAACCTGACACTGGTGCTAGCCATCATCG    |
| 1.5 DII-PD S-rev        | TGAACTAAAGGAACTGAGCAGCAAGGCCAGGAAGAGATTCA   |
| 1.3/1.5 DIII-VSDVL-rev  | GCTGTAGCATGTCTTCTAAGATTC                    |
| 1.3/1.5 DIII-VSD VL-for | GAAGGCATGAGGGTGGTTGTAAATGCTC                |
| 1.5 DIII-VSD S-for      | AGACATGCTACAGCATCGTGGAGCACAGCTGGTTTCGAGA    |
| 1.5 DIII-VSD S-rev      | CACCCTCATGCCTTCAAATCGTGACAGAGCTCTCAGAG      |
| 1.3/1.5 DIII-PD VL-rev  | ATTCATGATGGAGGGAATTGCACCAA                  |
| 1.3/1.5 DIII-PD VL-for  | GACAACTTCAACCAGCAGAAGAAGA                   |
| 1.5 DIII-PD S-for       | CCCTCCATCATGAATGTCCTCCTCGTCTGCCTCATCTTCT    |
| 1.5 DIII-PD S-rev       | CTGGTTGAAGTTGTCAATGATGACACCAATAAAGAGGTTTCAG |
| 1.3/1.5 DIV-VSD VL-for  | TGAGCCGAGCTTCTTCATTGCATTGT                  |
| 1.3/1.5 DIV-VSDVL-rev   | ACTCTGCTCTTTGCTTTGATGATGT                   |
| 1.5 DIV-VSD S-for       | AAGAAGCTCGGCTCAAAGAAGCCCCAGAAGCCCAT         |
| 1.5 DIV-VSD S-rev       | AGCAAAGAGCAGAGTGCGGATCCCCTTGCCCCCT          |
| 1.3/1.5 DII VL-for      | ATTCACAAGATGCTTCACTTTTAACCA                 |
| 1.3/1.5 DII VL-rev      | AGTTCCTTTAGTTCAGATAACCTTGC                  |
| 1.5 DII S-for           | AAGCATCTTGTGAATTTGGTGGTCATGGACCCGTTTACTG    |
| 1.5 DII S-rev           | TGAACTAAAGGAACTGAGCAGCAAGGCCAGGAAGAGATTCA   |
| 1.3/1.5 DIV-PD VL-rev   | GTTGAACAGCGCAGGAAGGGACA                     |
| 1.3/1.5 DIV-PD VL-for   | GAGAACTTCAAGCTCGCCACCGAA                    |
| 1.5 DIV-PD S-for        | CCTGCGCTGTTCAACATCGGGCTGCTGCTCTTCTCTCG      |
| 1.5 DIV-PD S-rev        | GACGCTGAAGTTCTCAGGATGATGGCAATGTACATGT       |

Note: both primers used to linearize the Na<sub>v</sub>1.3-cloned plasmid and primers used to amplify the specific regions of Na<sub>v</sub>1.5 are shown. The red labeled regions show the joint sequence.

Supplementary Table S3: Primers used to construct the Na<sub>v</sub>1.5 derived chimeric channels in supplementary Fig S6

| Primer ID             | Sequence 5'-3'                            |
|-----------------------|-------------------------------------------|
| 1.5/1.3 DI VL-rev     | CTTCACAGCCGCTCTCCGGATGGGGT                |
| 1.5/1.3 DI VL-for     | TATGAGGAGCAAAACCAAGCCACCATC               |
| 1.3 DI S-for          | AGAGCGGCTGTGAAGATTTTGGTACACTCTTTGTTGAGCA  |
| 1.3 DI S-rev          | GTTTTGCTCCTCATAGGCCATGGCCACCACA           |
| 1.5/1.3 DII VL-rev    | CTTCACTCCCTGCTTGATGGACATCCAC              |
| 1.5/1.3 DII VL-for    | AGCTCCTTCAGTGACAGACAACCTCA                |
| 1.3 DII S-for         | AAGCAGGGAGTGAAGTTAATTGTGATGGATCCATTTGTTGA |
| 1.3 DII S-rev         | TGCACTGAAGGAGCTCAACAATAAGGCCAGAAAGAGGTTCA |
| 1.5/1.3 DIII VL-rev   | GTGGTAGCAGGTCTTGCGCAACCGCC                |
| 1.5/1.3 DIII VL-for   | GACAACCTCAACCAACAGAAGAAAAAG               |
| 1.3 DIII S-for        | AAGACCTGCTACCACATTGTGGAGCACAACCTGGTTTGAGA |
| 1.3 DIII S-rev        | TTGGTTGAAGTTGCTATGATGACACCGATGAATAGATTT   |
| 1.5/1.3 DIV VL-rev    | GGAGCCCAGCTTCTTCATGGCATT                  |
| 1.5/1.3 DIV VL-for    | GAGAACTTCAGCGTGGCCACGGAGG                 |
| 1.3 DIV S-for         | AAGAAGCTGGGCTCC AAGAAACCTCAGAAGCCCAT      |
| 1.3 DIV S-rev         | CACGCTGAAGTTCTCAGGATGACAGCGATGTACATGTTCC  |
| 1.5/1.3 DII-PD VL-rev | GTTCCCCAGTGCCCCCACTGAGTTC                 |
| 1.5/1.3 DII-PD VL-for | AGCTCCTTCAGTGACAGACAACCTCA                |
| 1.3 DII-PD S-for      | GGGGCACTGGGGAACCTGACCCTGGTGCTGGCCATCATCGT |
| 1.3 DII-PD S-rev      | TGCACTGAAGGAGCTCAACAATAAGGCCAGAAAGAGGTTCA |

*Note:* both primers used to linearize the Na<sub>v</sub>1.5-cloned plasmid and primers used to amplify the specific regions of Na<sub>v</sub>1.3 are shown. The red labeled regions show the joint sequence.

Supplementary Table S4: Protein sequence location of each voltage sensor (VSD)/pore domain (PD) of all four domains of Na<sub>v</sub>1.3 or Na<sub>v</sub>1.5.

| Na <sub>v</sub> 1.3 domains  | Location in Na <sub>v</sub> 1.3 | Na <sub>v</sub> 1.5 domains  | Location in Na <sub>v</sub> 1.5 |
|------------------------------|---------------------------------|------------------------------|---------------------------------|
| Na <sub>v</sub> 1.3 DI-VSD   | AA124-AA233                     | Na <sub>v</sub> 1.5 DI-VSD   | AA127-AA236                     |
| Na <sub>v</sub> 1.3 DI-PD    | AA249-AA426                     | Na <sub>v</sub> 1.5 DI-PD    | AA253-AA415                     |
| Na <sub>v</sub> 1.3 DII-VSD  | AA706-AA820                     | Na <sub>v</sub> 1.5 DII-VSD  | AA712-AA825                     |
| Na <sub>v</sub> 1.3 DII-PD   | AA836-AA935                     | Na <sub>v</sub> 1.5 DII-PD   | AA842-AA939                     |
| Na <sub>v</sub> 1.3 DIII-VSD | AA1153-AA1269                   | Na <sub>v</sub> 1.5 DIII-VSD | AA1201-AA1317                   |
| Na <sub>v</sub> 1.3 DIII-PD  | AA1289-AA1419                   | Na <sub>v</sub> 1.5 DIII-PD  | AA1337-AA1470                   |
| Na <sub>v</sub> 1.3 DIV-VSD  | AA1473-AA1593                   | Na <sub>v</sub> 1.5 DIV-VSD  | AA1524-AA1644                   |
| Na <sub>v</sub> 1.3 DIV-PD   | AA1609-AA1722                   | Na <sub>v</sub> 1.5 DIV-PD   | AA1660-AA1772                   |

## Supplementary material and methods:

### The competitive binding assay:

In Figure 5c and 5d to test the potency of HNTX-III on RTX-VII pretreated Na<sub>v</sub>1.3 channels, HNTX-III was dissolved in bath solution containing 0.5 μM RTX-VII. Cells transfected with Na<sub>v</sub>1.3 were incubated with 0.5 μM RTX-VII (total volume: 300 μl) in the recording chamber before treating with HNTX-III of various dose (eg. 100 nM HNTX-III). 30 μl of the bath solution in the recording chamber was pipetted out, 30 μl of 1 μM HNTX-III (10 folds concentrated, dissolved in bath solution containing 0.5 μM RTX-VII) was added into the recording chamber far from the recording pipet (the cell) and quickly mixed by repeatedly pipetting to get the final concentration of 100 nM HNTX-III (with a microsyringe connected to the chamber by a thin pipe). To obtain 500 nM final concentration of HNTX-III in the recording chamber on the basis of 100 nM HNTX-III, 30 μl of the bath solution (total volume of 300 μl, already containing 100 nM HNTX-III and 0.5 μM RTX-VII) was pipetted out, and 30 μl of the 4 μM HNTX-III (also dissolved in bath solution containing 0.5 μM RTX-VII) was diluted into the chamber far from the recording pipet and quickly mixed by repeatedly pipetting to reach the final concentration of 500 nM HNTX-III. Hence, during the whole time course testing the potency of HNTX-III on Na<sub>v</sub>1.3, cells were always bathed in 0.5 μM RTX-VII. Note the cover glasses where transfected cells were seeded on were cut into small pieces and were one-use only (if toxin was added, only one cell in one piece of glass was recorded).
